# Supplementary material for: Functional Assessment of ATRX Alterations Improves Glioma Diagnosis
Source: Research Square preprint supplement (doi:10.21203/rs.3.rs-6974009/v1), 2025-07-18
Supplement: Supplementary file 1 [file 11179a7311b742ab11ab1d02.xlsx]

## Sheet: DATABASE
base	sample_name	diagnosis	amino_acid	alteration	function	TMM	type_mut	type_mut_per_sample	multiple_hits_within_sample	protein_domain	allele_involved
TCGA	P-0009411-T01-IM5	OD	10	K10N	VUS	na	missense_2nd	Mis/Mis	yes	X	**
TCGA	P-0011009-T01-IM5	OD	23	A23Hfs*18 (driver)	LOF	na	Fs	*	no	X	*
Pitié_Salpétrière	8652T	A	51	G51V	LOF	CC+ short Telo	missense	X	no	X	*
TCGA	P-0013676-T01-IM5	GBM	51	G51V	LOF	na	missense	*/Mis	yes	X	**
TCGA	GLSS-SF-0017-R2	A	96	K96Rfs*2 (driver)	LOF	na	Fs	*	no	X	**
TCGA	P-0016257-T01-IM6	A	97	P97Ffs*3 (driver)	LOF	na	Fs	*	no	X	**
TCGA	P-0002265-T04-IM5	GBM	102	T102I	VUS	na	missense	Mis	no	X	*
TCGA	TRF040046	A	105	E105*(driver)	LOF	na	*_2nd	*/*	yes	X	**
TCGA	P-0003529-T01-IM5	GBM	113	E113K, G1152D	VUS	na	missense	Mis/Mis	yes_princeps	X	**
TCGA	P-0010402-T01-IM5	IDHwt g.2-3 (pTERTwt)	124	G124Vfs*3 (driver)	LOF	na	Fs	*	no	X	**
TCGA	TCGA-DH-5144-01	OD	128	V128A	no effect	na	missense	Mis	no	X	*
TCGA	TCGA-4W-AA9T-01	IDHwt g.2-3 (pTERTwt)	160	R160H	VUS	na	missense	Mis	no	ADD	*
TCGA	P-0019244-T01-IM6	GBM	160	R160Tfs*29(driver)	LOF	na	Fs	*/*	yes	ADD	**
TCGA	P-0015573-T01-IM6	GBM	171	C171Y	VUS	na	missense	Mis	no	ADD	**
TCGA	P-0009451-T01-IM5	GBM	172	T172S	VUS	na	missense	Mis	no	ADD	**
TCGA	P-0013991-T01-IM5	OD	173	A173V	VUS	na	missense	Mis	no	ADD	*
TCGA	P-0006037-T01-IM5	A	176	Q176* (driver)	LOF	na	*	*	no	ADD	**
Pitié_Salpétrière	10890T	A	176	Q176Tfs*12	LOF	CC+ short Telo	Fs	X	no	ADD	**
TCGA	TCGA-06-0221-01	A	177	Q177* (driver)	LOF	na	*	*	no	ADD	**
TCGA	TCGA-E1-5322-01	OD	184	D184Ifs*22 (driver)	LOF	na	Fs	*	no	ADD	*
Pitié_Salpétrière	8258T	A	187	Y187fs	LOF	CC+ short Telo	Fs	X	no	ADD	**
Pitié_Salpétrière	8534T	GBM	188	R188K	no effect	TA+	missense	X	no	ADD	*/clonal
Pitié_Salpétrière	10055T	A	188	R188Kfs*13	LOF	CC+ short Telo	Fs	X	no	ADD	*
TCGA	TCGA-DB-A4XE-01	A	189	H189Pfs*9 (driver)	LOF	na	Fs	*	no	ADD	*
TCGA	TCGA-FG-A713-01	OD	198	X198_splice (driver)	LOF	na	splice	splice	no	ADD	*
TCGA	P-0017704-T01-IM6	A	199	X199_splice (driver)	LOF	na	splice	splice	no	ADD	**
TCGA	TCGA-HT-7477-01	A	199	X199_splice (driver)	LOF	na	splice	splice	no	ADD	**
TCGA	TCGA-DB-A4XD-01	A	199	X199_splice(driver)	LOF	na	splice_2nd	*/splice	yes	ADD	**
TCGA	TCGA-P5-A735-01	A	201	F201Lfs*2 (driver)	LOF	na	Fs	*	no	ADD	*
TCGA	TCGA-HT-7485-01	A	202	K202* (driver)	LOF	na	*	*	no	ADD	**
TCGA	TRF047609	A	204	Y204* (driver)	LOF	na	*	*	no	ADD	*
TCGA	TCGA-DU-5871-01	A	216	M216* (driver)	LOF	na	*	*	no	ADD	*
TCGA	P-0002128-T01-IM3	A	221	R221K	VUS	na	missense	Mis	no	ADD	*
TCGA	TCGA-HW-8319-01	A	221	R221K	VUS	na	missense	Mis	no	ADD	*
TCGA	TCGA-TM-A7C4-01	A	221	X221_splice (driver)	LOF	na	splice	splice	no	ADD	*
TCGA	TCGA-DU-8166-01	A	221	X221_splice (driver)	LOF	na	splice	splice	no	ADD	*
TCGA	GLSS-SF-0161-R1	A	221	X221_splice (driver)	LOF	na	splice	splice	no	ADD	*
TCGA	GLSS-MD-0088-R1	A	221	X221_splice (driver)	LOF	na	splice	splice	no	ADD	**
TCGA	Mayo-PDX-Sarkaria-196	A	221	X221_splice (driver)	LOF	na	splice	splice	no	ADD	*
TCGA	P-0010516-T01-IM5	A	222	W222* (driver)	LOF	na	*	*	no	ADD	*
TCGA	TCGA-DB-5281-01	A	222	W222* (driver)	LOF	na	*	*	no	ADD	**
TCGA	GLSS-DK-0008-R1	IDHwt g.2-3 (pTERTwt)	227	G227R	VUS	na	missense	*/3Mis	yes	ADD	**
Pitié_Salpétrière	10804T	A	229	L229Dfs*4	LOF	CC+ short Telo	Fs	X	no	ADD	*
TCGA	TCGA-DU-7008-01	A	237	N237Kfs*23 (driver)	LOF	na	Fs	*	no	ADD	*
TCGA	P-0015666-T01-IM6	A	242	K242* (driver)	LOF	na	*	*	no	ADD	*
TCGA	P-0017463-T01-IM6	A	250	R250* (driver)	LOF	na	*	*	no	ADD	*
TCGA	TCGA-S9-A7R7-01	A	250	R250* (driver)	LOF	na	*	*	no	ADD	**
TCGA	TCGA-DB-5273-01	A	262	Q262* (driver)	LOF	na	*	*	no	ADD	**
Pitié_Salpétrière	9284T	A	263	W263*	LOF	CC+ short Telo	*	X	no	ADD	**
TCGA	TCGA-HW-A5KL-01	A	263	W263R	VUS	na	missense	Mis	no	ADD	**
TCGA	TCGA-DU-7015-01	A	264	Y264Ffs*24 (driver)	LOF	na	Fs	*	no	ADD	**
TCGA	TCGA-E1-5303-01	A	273	L273Ffs*9 (driver)	LOF	na	Fs	*	no	ADD	**
TCGA	P-0016404-T01-IM6	A	274	L274*(driver)	LOF	na	*_2nd	*/*	yes	ADD	**
TCGA	GLSS-SF-0012-R1	A	277	V277Tfs*7 (driver)	LOF	na	Fs	*	no	ADD	**
TCGA	P12_Pri	A	277	V277Tfs*7 (driver)	LOF	na	Fs	*	no	ADD	**
TCGA	TCGA-FG-8185-01	A	278	T278Sfs*3 (driver)	LOF	na	Fs	*	no	ADD	**
Pitié_Salpétrière	8767T	A	280	C280Afs*6	LOF	ALT	Fs	X	no	ADD	*
TCGA	P-0005477-T01-IM5	GBM	280	C280R	VUS	na	missense	Mis	no	ADD	*
TCGA	P16_Pri	A	281	N281Sfs*21 (driver)	LOF	na	Fs	*	no	ADD	*
TCGA	P-0018387-T01-IM6	A	282	S282Afs*6(driver)	LOF	na	Fs_2nd	*/*	yes	ADD	**
TCGA	GLSS-MD-0094-R1	A	284	F284Lfs*4 (driver)	LOF	na	Fs	*	no	ADD	*
Pitié_Salpétrière	9349T	A	285	E285*	LOF	long telo	*	X	no	ADD	*
TCGA	P-0013602-T01-IM5	A	287	L287* (driver)	LOF	na	*	*	no	ADD	**
TCGA	TCGA-S9-A7QX-01	A	289	Q289Sfs*10 (driver)	LOF	na	Fs	*	no	ADD	*
TCGA	P-0004712-T01-IM5	IDHwt g.2-3 (pTERTwt)	292	Q292* (driver)	LOF	na	*	*	no	ADD	**
TCGA	TCGA-DB-A64S-01	A	292	Q292*(driver)	LOF	na	*_2nd	*/*	yes	ADD	**
TCGA	TCGA-DU-6399-01	A	295	K295Rfs*4 (driver)	LOF	na	Fs	*	no	ADD	**
TCGA	TCGA-DH-A66D-01	A	303	E303* (driver)	LOF	na	*	*	no	X	*
Pitié_Salpétrière	9719T	GBM	305	S305R	no effect	TA+	missense	X	no	X	**
TCGA	P-0016168-T01-IM6	A	313	S313Ifs*9 (driver)	LOF	na	Fs	*	no	X	**
TCGA	P-0009216-T01-IM5	A	319	K319* (driver)	LOF	na	*	*	no	X	**
TCGA	TRF077655	GBM	326	G326* (driver)	LOF	na	*	*	no	X	*
TCGA	TCGA-P5-A5EW-01	A	329	K329Ifs*3 (driver)	LOF	na	Fs	*	no	X	*
TCGA	P-0003268-T01-IM5	A	330	K330Nfs*2 (driver)	LOF	na	Fs	*	no	X	**
TCGA	P-0009193-T01-IM5	A	341	Y341* (driver), L413V, E410D	LOF	na	*	*/Mis	yes_princeps	X	**
TCGA	P-0002316-T01-IM3	GBM	342	S342* (driver), H493_K495dup	LOF	na	*	*/DELINS	yes_princeps	X	**
Pitié_Salpétrière	9699T	GBM	347	I347M	no effect	TA+	missense	X	no	X	**
TCGA	TCGA-HT-A616-01	A	351	E351* (driver)	LOF	na	*	*	no	X	**
TCGA	P-0017802-T01-IM6	A	354	K354* (driver)	LOF	na	*	*	no	X	*
TCGA	P-0017475-T01-IM6	A	356	A356Efs*4 (driver)	LOF	na	Fs	*	no	X	**
Pitié_Salpétrière	8912T	A	358	K358Nfs*2	LOF	long telo	Fs	X	no	X	*
Pitié_Salpétrière	9520T	A	358	K358Nfs*2	LOF	TA+	Fs	X	no	X	**
TCGA	TCGA-CS-4938-01	A	358	K358Nfs*2 (driver)	LOF	na	Fs	*	no	X	*
TCGA	TCGA-19-2629-01	A	358	K358Tfs*3 (driver)	LOF	na	Fs	*	no	X	**
TCGA	P-0005635-T01-IM5	A	359	L359Tfs*3 (driver)	LOF	na	Fs	*	no	X	*
TCGA	TCGA-FG-6691-01	A	359	L359Tfs*3 (driver)	LOF	na	Fs	*	no	X	*
TCGA	TCGA-HT-7884-01	A	359	L359Tfs*3 (driver)	LOF	na	Fs	*	no	X	*
TCGA	P-0011257-T01-IM5	A	359	L359Tfs*3 (driver)	LOF	na	Fs	*	no	X	*
TCGA	P-0016048-T01-IM6	H3.3mt	359	L359Tfs*3 (driver)	LOF	na	Fs	*	no	X	**
TCGA	TCGA-DU-6401-01	A	359	L359Tfs*3 (driver), AMP	LOF	na	Fs	*/AMP	yes_princeps	X	**
TCGA	TCGA-VM-A8CF-01	A	360	I360Rfs*6 (driver)	LOF	na	Fs	*	no	X	*
TCGA	TCGA-F6-A8O4-01	A	360	I360Rfs*6 (driver)	LOF	na	Fs	*	no	X	**
TCGA	P-0006182-T01-IM5	H3.3mt	360	I360Rfs*6 (driver)	LOF	na	Fs	*	no	X	**
TCGA	TRF040046	A	360	I360Rfs*6 (driver), E105* (driver)	LOF	na	Fs	*/*	yes_princeps	X	**
TCGA	Mayo-PDX-Sarkaria-164	A	360	I360Rfs*6 (driver), HOMDEL (driver)	LOF	na	Fs	*/HOMDEL	yes_princeps	X	**
TCGA	GLSS-CU-R009-R1	A	360	I360Rfs*6 (driver), R1401W, S917F	LOF	na	Fs	*/Mis	yes_princeps	X	**
TCGA	TCGA-DB-A75M-01	A	366	M366* (driver)	LOF	na	*	*	no	X	**
TCGA	TCGA-HT-7689-01	A	370	Y370* (driver)	LOF	na	*	*	no	X	*
TCGA	P-0019638-T01-IM6	A	381	S381* (driver)	LOF	na	Fs	*	no	X	**
TCGA	TCGA-DH-A7UV-01	A	381	S381Qfs*33 (driver)	LOF	na	Fs	*	no	X	**
TCGA	Patient-07-T1	A	383	I383Nfs*11 (driver)	LOF	na	Fs	*	no	X	*
TCGA	P-0002386-T01-IM3	A	383	I383Nfs*11 (driver)	LOF	na	Fs	*	no	X	*
TCGA	P-0013970-T01-IM5	A	389	L389* (driver)	LOF	na	*	*	no	X	**
TCGA	P-0004723-T01-IM5	A	391	Q391* (driver)	LOF	na	*	*	no	X	*
Pitié_Salpétrière	9606T	?	395	F395Lfs*19	LOF	CC+ short Telo	Fs	X	no	X	*
TCGA	TCGA-S9-A7QW-01	A	398	V398Cfs*4 (driver)	LOF	na	Fs	*	no	X	*
TCGA	P-0004073-T01-IM5	A	400	A400Gfs*14 (driver)	LOF	na	Fs	*	no	X	**
TCGA	TCGA-HT-7858-01	A	403	K403Rfs*11 (driver)	LOF	na	Fs	*	no	X	**
Pitié_Salpétrière	10749T	A	404	K404*	LOF	ALT	*	X	no	X	**
TCGA	TCGA-FG-6690-01	A	409	L409* (driver)	LOF	na	*	*	no	X	**
TCGA	P-0014728-T01-IM6	A	413	L413* (driver)	LOF	na	*	*	no	X	**
TCGA	TCGA-HT-7469-01	H3.3mt	413	L413Kfs*20 (driver)	LOF	na	Fs	*	no	X	**
TCGA	P-0009193-T01-IM5	A	413	L413V	VUS	na	missense_2nd	*/Mis	yes	X	**
Pitié_Salpétrière	10903T	MAPK (NF1)	418	R418*	LOF	ALT	*	X	no	X	**
TCGA	TCGA-E1-5307-01	A	418	R418* (driver)	LOF	na	*	*	no	X	**
TCGA	TRF020252	GBM	419	A419T	VUS	na	missense	Mis	no	X	*
TCGA	P-0012671-T01-IM5	A	425	K425Rfs*8 (driver)	LOF	na	Fs	*	no	X	**
TCGA	TCGA-FG-8188-01	A	425	K425Rfs*8 (driver)	LOF	na	Fs	*	no	X	**
TCGA	TRF050441	A	425	K425Rfs*8(driver)	LOF	na	Fs_2nd	*/*	yes	X	**
TCGA	TCGA-E1-A7Z6-01	A	428	N428Yfs*5 (driver)	LOF	na	Fs	*	no	X	*
TCGA	P-0009499-T01-IM5	A	428	N428Yfs*5 (driver), P663L, K427R	LOF	na	Fs	*/Mis	yes_princeps	X	**
TCGA	P-0009415-T01-IM5	GBM	443	A443E	VUS	na	missense	Mis	no	X	*
TCGA	P-0009507-T01-IM5	A	444	R444* (driver)	LOF	na	*	*	no	X	**
TCGA	P-0004515-T01-IM5	A	444	R444*(driver)	LOF	na	*_2nd	*/*	yes	X	**
TCGA	GLSS-DK-0008-R1	IDHwt g.2-3 (pTERTwt)	446	G446Rfs*18 (driver), E851K, G227R, P2298S	LOF	na	Fs	*/3Mis	yes_princeps	X	**
TCGA	TCGA-HT-A618-01	A	454	K454Rfs*16 (driver), AMP	LOF	na	Fs	*/AMP	yes_princeps	X	**
TCGA	TCGA-DU-A7T8-01	A	458	S458* (driver)	LOF	na	Fs	*	no	X	**
TCGA	TRF041805	A	458	S458* (driver), K1409Qfs*80 (driver)	LOF	na	Fs	*/*	yes_princeps	X	**
TCGA	P-0004038-T01-IM3	GBM	459	K459E	VUS	na	missense	Mis	no	X	*
TCGA	TCGA-DB-5270-01	A	460	S460Vfs*4 (driver)	LOF	na	Fs	*	no	X	*
TCGA	P-0005138-T01-IM5	A	465	S465* (driver)	LOF	na	*	*	no	X	*
TCGA	TCGA-QH-A870-01	A	465	S465* (driver)	LOF	na	*	*	no	X	*
TCGA	GLSS-MD-0082-TP	A	465	S465* (driver), R666* (driver)	LOF	na	*	*/*	yes_princeps	X	**
TCGA	TCGA-HT-7476-01	A	467	K467Tfs*4 (driver)	LOF	na	Fs	*	no	X	**
Pitié_Salpétrière	10897T	A	469	V469Ifs*44 (driver)	LOF	ALT	Fs	X	no	X	*
TCGA	TCGA-DU-6407-01	A	469	V469Ifs*44 (driver)	LOF	na	Fs	*	no	X	*
TCGA	GLSS-SF-0024-R2	A	469	V469Ifs*44 (driver)	LOF	na	Fs	*	no	X	**
TCGA	P-0019089-T01-IM6	A	469	V469Ifs*44 (driver)	LOF	na	Fs	*	no	X	**
TCGA	P24_Pri	A	469	V469Ifs*44 (driver), R1302Nfs*6 (driver)	LOF	na	Fs	*/*	yes_princeps	X	**
TCGA	P-0002656-T01-IM3	IDHwt g.2-3 (pTERTwt)	471	S471Vfs*43 (driver)	LOF	na	Fs	*	no	X	**
Pitié_Salpétrière	9677T	MAPK (GG)	473	H473Profs*41	LOF	CC+ short Telo	Fs	X	no	X	*
TCGA	P-0003900-T01-IM5	GBM	484	R484K	VUS	na	missense_2nd	Mis/Mis	yes	X	**
Pitié_Salpétrière	10958T	A	492	E492Tfs*2	LOF	long telo	Fs	X	no	X	*
TCGA	P-0002316-T01-IM3	GBM	493	H493_K495dup	VUS	na	DEL/INS(in frame)_2nd	*/DELINS	yes	X	**
Pitié_Salpétrière	8379T	MAPK (glioneural BRAFmt)	493	H493fs	secondary hit no effect	TA+	Fs	X	no	X	*
TCGA	TCGA-HT-8013-01	A	505	E505* (driver)	LOF	na	*	*	no	X	*
TCGA	P-0011213-T01-IM5	H3.3mt	513	L513* (driver)	LOF	na	*	*	no	X	**
TCGA	Patient-16-T	H3.3mt	513	L513* (driver)	LOF	na	*	*	no	X	**
TCGA	GLSS-SF-0339-R1	A	519	S519Cfs*11 (driver)	LOF	na	Fs	*	no	X	**
TCGA	GLSS-SF-0157-R1	A	519	S519Vfs*12 (driver)	LOF	na	Fs	*	no	X	*
TCGA	TCGA-DB-5276-01	A	522	S522Qfs*39 (driver)	LOF	na	Fs	*	no	X	*
TCGA	TRF036897	A	525	P525Qfs*37 (driver)	LOF	na	Fs	*	no	X	*
TCGA	P-0014883-T01-IM6	A	528	I528Lfs*33(driver)	LOF	na	Fs_2nd	*/*	yes	X	**
TCGA	GLSS-MD-0091-R1	A	530	E530* (driver)	LOF	na	*	*	no	X	*
TCGA	GLSS-MD-0043-R1	A	543	D543Ifs*19 (driver)	LOF	na	Fs	*	no	X	*
Pitié_Salpétrière	8786T	A	559	S559fs	LOF	CC+ short Telo	Fs	X	no	X	**
TCGA	TCGA-DU-5851-01	A	563	L563Yfs*11 (driver)	LOF	na	Fs	*	no	X	*
TCGA	P-0013747-T01-IM5	A	567	S567* (driver), K1083Qfs*7 (driver)	LOF	na	Fs	*/*	yes_princeps	X	**
TCGA	TRF054314	OD	579	T579A	VUS	na	missense	Mis	no	X	**
Pitié_Salpétrière	9392T	GBM	596	S596C	LOF	long telo	missense	X	no	X	*
TCGA	GLSS-SF-0011-R1	A	600	I600Vfs*19 (driver)	LOF	na	Fs	*	no	X	*
TCGA	P11_Pri	A	600	I600Vfs*19 (driver)	LOF	na	Fs	*	no	X	*
Pitié_Salpétrière	8888T	A	606	Q606*	LOF	CC+ short Telo	*	X	no	X	**
TCGA	TCGA-S9-A7IZ-01	A	607	E607Kfs*14 (driver)	LOF	na	Fs	*	no	X	*
TCGA	TCGA-HT-A614-01	A	610	Q610* (driver)	LOF	na	*	*	no	X	**
Pitié_Salpétrière	9834T	H3.3mt	654	p.R654Ter	LOF	CC+ short Telo	*	X	no	X	*
TCGA	TCGA-VM-A8C8-01	A	654	R654* (driver)	LOF	na	*	*	no	X	*
TCGA	C3L-00677	GBM	654	R654* (driver)	LOF	na	*	*	no	X	*
TCGA	TCGA-P5-A5F1-01	A	654	R654* (driver)	LOF	na	*	*	no	X	**
Pitié_Salpétrière	10597T	A	655	R655Sfs*13	LOF	ALT	Fs	X	no	X	**
TCGA	TCGA-DU-6395-01	A	658	R658Vfs*2 (driver)	LOF	na	Fs	*	no	X	**
TCGA	TCGA-DB-5280-01	A	662	T662Dfs*4 (driver)	LOF	na	Fs	*	no	X	*
TCGA	P-0009499-T01-IM5	A	663	P663L	VUS	na	missense_2nd	*/Mis	yes	X	**
TCGA	P-0011401-T01-IM5	GBM	666	R666* (driver)	LOF	na	*	*	no	X	*
TCGA	GLSS-MD-0082-TP	A	666	R666*(driver)	LOF	na	*_2nd	*/*	yes	X	**
TCGA	P-0008035-T01-IM5	A	684	T684Sfs*2 (driver)	LOF	na	Fs	*	no	X	**
TCGA	P-0009411-T01-IM5	OD	687	E687K, K10N	VUS	na	missense	Mis/Mis	yes_princeps	X	**
TCGA	TCGA-S9-A6WO-01	A	690	K690Tfs*10 (driver)	LOF	na	Fs	*	no	X	*
TCGA	TCGA-HW-7489-01	A	699	D699Gfs*2 (driver)	LOF	na	Fs	*	no	X	**
TCGA	GLSS-19-0279-R1	A	699	D699Ifs*10 (driver)	LOF	na	Fs	*	no	X	**
TCGA	TRF014752	A	708	I708Yfs*3 (driver)	LOF	na	Fs	*	no	X	**
TCGA	TCGA-HT-7611-01	A	715	K715Afs*4 (driver)	LOF	na	Fs	*	no	X	*
TCGA	P-0015722-T01-IM6	GBM	717	P717_K720del	VUS	na	DEL/INS (in frame)	DELINS	no	X	*
TCGA	TCGA-E1-A7Z4-01	A	729	S729* (driver)	LOF	na	*	*	no	X	**
TCGA	TCGA-06-6391-01	GBM	740	E740* (driver)	LOF	na	*	*	no	X	*
TCGA	TCGA-TQ-A7RR-01	A	755	N755Mfs*13 (driver)	LOF	na	Fs	*	no	X	**
Pitié_Salpétrière	11054T	H3.3mt	761	H761Sfs*2	LOF	ALT	Fs	X	no	X	*
Pitié_Salpétrière	10355T	GBM	763	T763Ifs*5	LOF	CC+ short Telo	Fs	X	no	X	**
Pitié_Salpétrière	10374T	OD	763	T763Ifs*5	LOF	TA+	Fs	X	no	X	*
TCGA	TRF040878	A	764	L764Vfs*2 (driver)	LOF	na	Fs	*	no	X	**
TCGA	GLSS-CU-R012-R1	A	765	Y765Ifs*2 (driver)	LOF	na	Fs	*	no	X	**
TCGA	TCGA-HT-7473-01	A	766	D766Rfs*10 (driver)	LOF	na	Fs	*	no	X	**
TCGA	TRF043510	A	767	L767* (driver)	LOF	na	*	*	no	X	**
TCGA	P-0015816-T01-IM6	A	778	K778Nfs*23 (driver)	LOF	na	Fs	*	no	X	**
TCGA	TRF053947	GBM	781	R781* (driver)	LOF	na	*	*	no	X	**
TCGA	P-0009629-T01-IM5	A	781	R781* (driver)	LOF	na	*	*	no	X	**
TCGA	GLSS-MD-0049-R1	A	781	R781* (driver)	LOF	na	*	*	no	X	**
TCGA	TCGA-DU-A5TP-01	A	781	R781* (driver)	LOF	na	*	*	no	X	**
TCGA	P-0010443-T01-IM5	A	784	S784Lfs*13 (driver)	LOF	na	Fs	*	no	X	*
Pitié_Salpétrière	10187T	A	789	D789Efs*7	LOF	ALT	Fs	X	no	X	*/clonal
TCGA	P-0018317-T01-IM6	A	797	S797* (driver)	LOF	na	*	*	no	X	**
TCGA	TCGA-S9-A7R8-01	A	802	I802V	VUS	na	missense_2nd	*/Mis	yes	X	**
TCGA	TCGA-S9-A7R8-01	A	806	K806Rfs*16 (driver), I802V	LOF	na	Fs	*/Mis	yes_princeps	X	**
TCGA	C3N-01851	H3.3mt	808	R808* (driver)	LOF	na	*	*	no	X	**
TCGA	TCGA-TM-A84L-01	A	808	R808* (driver)	LOF	na	*	*	no	X	**
TCGA	P-0019484-T01-IM6	A	808	R808* (driver)	LOF	na	*	*	no	X	**
TCGA	TCGA-WY-A85E-01	A	817	Y817* (driver)	LOF	na	*	*	no	X	*
Pitié_Salpétrière	10869T	GBM	817	Y817Sfs*4	secondary hit no effect	TA+	Fs	X	no	X	*/clonal
Pitié_Salpétrière	10879T	GBM	817	Y817Sfs*4	secondary hit no effect	TA+	Fs	X	no	X	*
Pitié_Salpétrière	11007T	A	820	E820*	LOF	ALT	*	X	no	X	**
TCGA	P-0001320-T01-IM3	A	823	K823Rfs*7 (driver)	LOF	na	Fs	*	no	X	**
TCGA	TCGA-DU-7301-01	A	826	K826Efs*4 (driver)	LOF	na	Fs	*	no	X	**
TCGA	P-0002313-T01-IM3	A	834	A834Pfs*35 (driver)	LOF	na	Fs	*	no	X	*
TCGA	P-0012156-T01-IM5	GBM	840	R840Efs*29 (driver)	LOF	na	Fs	*	no	X	**
TCGA	P-0001730-T01-IM3	A	840	R840Kfs*9 (driver)	LOF	na	Fs	*	no	X	*
TCGA	P-0002051-T01-IM3	A	840	R840Kfs*9 (driver)	LOF	na	Fs	*	no	X	**
TCGA	GLSS-SF-0001-R1	A	840	R840Kfs*9 (driver)	LOF	na	Fs	*	no	X	**
TCGA	P01_Pri	A	840	R840Kfs*9 (driver)	LOF	na	Fs	*	no	X	**
TCGA	TCGA-VM-A8CH-01	A	849	S849Ffs*2 (driver)	LOF	na	Fs	*	no	X	**
TCGA	GLSS-DK-0008-R1	IDHwt g.2-3 (pTERTwt)	851	E851K	VUS	na	missense	*/3Mis	yes	X	**
TCGA	TCGA-TQ-A7RV-01	A	855	H855Qfs*7 (driver)	LOF	na	Fs	*	no	X	*
TCGA	P-0002335-T01-IM3	A	871	S871Hfs*34 (driver)	LOF	na	Fs	*	no	X	**
TCGA	TCGA-QH-A6XA-01	A	878	D878Efs*27 (driver)	LOF	na	Fs	*	no	X	*
TCGA	TCGA-14-1402-R1	GBM	879	A879V, E979K	VUS	na	missense	Mis/Mis	yes_princeps	X	**
Pitié_Salpétrière	9034T	A	883	Q883Rfs*13	LOF	CC+ short Telo	Fs	X	no	X	*
TCGA	GLSS-SF-0027-R1	A	883	Q883Rfs*13 (driver)	LOF	na	Fs	*	no	X	**
TCGA	P27_Pri_A	A	883	Q883Rfs*13 (driver)	LOF	na	Fs	*	no	X	**
Pitié_Salpétrière	10741T	A	886	E886*	LOF	ALT	*	X	no	X	**
TCGA	GLSS-SF-0008-R1	A	886	E886Dfs*10 (driver)	LOF	na	Fs	*	no	X	**
TCGA	P08_Pri	A	886	E886Dfs*10 (driver)	LOF	na	Fs	*	no	X	**
TCGA	TCGA-DB-A4XC-01	A	886	E886Lfs*18 (driver)	LOF	na	Fs	*	no	X	**
TCGA	TCGA-06-0129-01	A	886	E886Lfs*18 (driver)	LOF	na	Fs	*	no	X	**
Pitié_Salpétrière	8352T	H3.3mt	886	p.E886Lfs*18	LOF	ALT	Fs	X	no	X	*
TCGA	P-0001731-T01-IM3	GBM	888	F888Sfs*17 (driver)	LOF	na	Fs	*	no	X	**
TCGA	Patient-23-T	H3.3mt	888	F888Sfs*17 (driver)	LOF	na	Fs	*	no	X	**
Pitié_Salpétrière	9337T	A	889	S889Ffs*7	LOF	CC+ short Telo	Fs	X	no	X	**
TCGA	TCGA-DU-A5TS-01	A	889	S889Lfs*8 (driver)	LOF	na	Fs	*	no	X	**
TCGA	P-0019244-T01-IM6	GBM	899	T899M	VUS	na	missense	*/*	yes	X	**
TCGA	P-0005243-T01-IM5	A	902	M902_E903delinsIQ	VUS	na	DEL/INS(in frame)_2nd	*/DELINS	yes	X	**
TCGA	C3N-02783	GBM	907	R907* (driver)	LOF	na	*	*	no	X	*
TCGA	P-0004242-T01-IM5	A	907	R907* (driver)	LOF	na	*	*	no	X	*
TCGA	TCGA-HT-A74J-01	A	907	R907* (driver)	LOF	na	*	*	no	X	**
TCGA	GLSS-SF-0065-R1	A	907	R907* (driver)	LOF	na	*	*	no	X	**
TCGA	TCGA-32-4208-01	A	907	R907* (driver)	LOF	na	*	*	no	X	**
TCGA	TCGA-DU-A76O-01	A	907	R907* (driver), D1791Y	LOF	na	*	*/Mis	yes_princeps	X	**
TCGA	P-0016404-T01-IM6	A	907	R907* (driver), L274* (driver)	LOF	na	*	*/*	yes_princeps	X	**
TCGA	P-0005243-T01-IM5	A	907	R907* (driver), M902_E903delinsIQ	LOF	na	*	*/DELINS	yes_princeps	X	**
TCGA	TCGA-HT-7873-01	A	907	R907Dfs*63 (driver)	LOF	na	Fs	*	no	X	**
Pitié_Salpétrière	9354T	MAPK (glioneural BRAFmt)	907	R907Q	LOF	long telo	missense	X	no	X	*/SNP
TCGA	TRF041560	A	915	S915Lfs*54 (driver)	LOF	na	Fs	*	no	X	*
TCGA	TCGA-HT-7879-01	A	916	A916Vfs*54 (driver)	LOF	na	Fs	*	no	X	**
Pitié_Salpétrière	10292T	GBM	921	V921I	no effect	TA+	missense	X	no	X	*
TCGA	gbm_columbia_2019_25	A	923	K923Lfs*45 (driver)	LOF	na	Fs	*	no	X	*
TCGA	TRF035707	A	928	E928* (driver)	LOF	na	*	*	no	X	**
TCGA	P-0015712-T01-IM6	A	930	S930Ffs*7 (driver)	LOF	na	Fs	*	no	X	**
TCGA	TRF030607	A	938	K938* (driver)	LOF	na	*	*	no	X	**
TCGA	P-0006404-T01-IM5	GBM	945	K945Rfs*25 (driver)	LOF	na	Fs	*	no	X	**
TCGA	P-0003292-T01-IM5	A	945	K945Rfs*25 (driver)	LOF	na	Fs	*	no	X	**
TCGA	TCGA-HT-7880-01	A	950	K950* (driver)	LOF	na	*	*	no	X	*
TCGA	TCGA-19-A6J5-01	A	957	V957Yfs*13 (driver)	LOF	na	Fs	*	no	X	**
TCGA	TCGA-DU-A5TW-01	A	971	K971Tfs*31 (driver)	LOF	na	Fs	*	no	X	*
TCGA	TCGA-P5-A733-01	A	971	K971Tfs*31 (driver)	LOF	na	Fs	*	no	X	*
TCGA	P-0003428-T01-IM5	A	971	K971Tfs*31 (driver)	LOF	na	Fs	*	no	X	*
TCGA	Mayo-PDX-Sarkaria-36	GBM	971	K971Tfs*31 (driver)	LOF	na	Fs	*	no	X	**
Pitié_Salpétrière	10280T	H3.3mt	971	p.K971Tfs	LOF	ALT	Fs	X	no	X	**
TCGA	TRF033231	A	977	T977Rfs*33 (driver)	LOF	na	Fs	*	no	X	*
TCGA	TCGA-14-1402-R1	GBM	979	E979K	VUS	na	missense_2nd	Mis/Mis	yes	X	**
Pitié_Salpétrière	10618T	MAPK (NF1)	980	D980Efs*23	LOF	CC+ short Telo	Fs	X	no	X	*
Pitié_Salpétrière	8904T	A	987	K987*	FN quantity	TA+	*	X	no	X	*
Pitié_Salpétrière	10682T	GBM	994	K994*	LOF	ALT	*	X	no	X	**
TCGA	GLSS-MD-0021-TP	A	994	K994Tfs*5 (driver)	LOF	na	Fs	*	no	X	*
TCGA	TCGA-DU-7298-01	A	1002	V1002* (driver)	LOF	na	*	*	no	X	*
TCGA	TCGA-HT-7604-01	A	1002	V1002* (driver)	LOF	na	*	*	no	X	**
TCGA	TRF011251	GBM	1002	V1002Lfs*30 (driver)	LOF	na	Fs	*	no	X	**
TCGA	TCGA-TM-A84Q-01	A	1002	V1002Lfs*30 (driver)	LOF	na	Fs	*	no	X	**
TCGA	TCGA-FG-A711-01	A	1003	I1003Kfs*29 (driver)	LOF	na	Fs	*	no	X	*
TCGA	C3N-03188	GBM	1007	Q1007H	VUS	na	missense	Mis	no	X	*
TCGA	P-0019001-T01-IM6	A	1010	E1010Mfs*24 (driver)	LOF	na	Fs	*	no	X	*
TCGA	P-0003333-T01-IM5	A	1017	E1017Dfs*5 (driver)	LOF	na	Fs	*	no	X	**
TCGA	TCGA-06-6388-01	GBM	1018	K1018N	VUS	na	missense	Mis	no	X	*
TCGA	P17_Pri_A	A	1035	I1035Efs*5 (driver)	LOF	na	Fs	*	no	X	**
Pitié_Salpétrière	10773T	A	1045	K1045*	LOF	ALT	*	X	no	X	*
Pitié_Salpétrière	11191T	A	1045	K1045*	LOF	CC+ short Telo	*	X	no	X	*
TCGA	P-0003822-T02-IM5	A	1045	K1045* (driver)	LOF	na	*	*	no	X	*
TCGA	P-0001471-T01-IM3	GBM	1045	K1045* (driver)	LOF	na	*	*	no	X	*
TCGA	P-0002691-T01-IM3	A	1045	K1045* (driver)	LOF	na	*	*	no	X	*
TCGA	TCGA-IK-7675-01	A	1045	K1045* (driver)	LOF	na	*	*	no	X	*
TCGA	TCGA-QH-A6X3-01	A	1045	K1045* (driver)	LOF	na	*	*	no	X	**
TCGA	P-0008242-T01-IM5	A	1045	K1045* (driver)	LOF	na	*	*	no	X	**
TCGA	P-0001975-T01-IM3	A	1045	K1045* (driver)	LOF	na	*	*	no	X	**
TCGA	GLSS-SF-0028-R1	A	1045	K1045* (driver)	LOF	na	*	*	no	X	**
TCGA	P28_Pri	A	1045	K1045* (driver)	LOF	na	*	*	no	X	**
Pitié_Salpétrière	9867T	H3.3mt	1045	p.K1045TEr	LOF	CC+ short Telo	*	X	no	X	*
TCGA	TCGA-TM-A84T-01	A	1049	I1049* (driver)	LOF	na	Fs	*	no	X	**
TCGA	P-0016576-T01-IM6	A	1049	I1049Efs*68 (driver)	LOF	na	Fs	*	no	X	**
Pitié_Salpétrière	8254T	A	1049	I1049Kfs*69	LOF	ALT	Fs	X	no	X	*
TCGA	P-0018097-T01-IM6	A	1049	I1049Kfs*69 (driver)	LOF	na	Fs	*	no	X	*
TCGA	TCGA-E1-A7YV-01	A	1049	I1049Kfs*69 (driver)	LOF	na	Fs	*	no	X	*
TCGA	TRF027848	A	1049	I1049Nfs*4 (driver)	LOF	na	Fs	*	no	X	*
TCGA	TCGA-HT-8114-01	A	1049	I1049Nfs*4 (driver)	LOF	na	Fs	*	no	X	*
TCGA	GLSS-MD-0012-R1	A	1049	I1049Nfs*4 (driver)	LOF	na	Fs	*	no	X	**
TCGA	P-0006782-T01-IM5	A	1049	I1049Nfs*4 (driver), R1302Efs*44 (driver)	LOF	na	Fs	*/*	yes_princeps	X	**
TCGA	GLSS-HF-2829-R1	MAPK (GBM NF1)	1064	A1064T	VUS	na	missense	Mis	no	X	*
TCGA	P-0005249-T01-IM5	A	1071	G1071* (driver)	LOF	na	*	*	no	X	**
TCGA	TRF018670	A	1078	E1078Qfs*51 (driver)	LOF	na	Fs	*	no	X	*
TCGA	P-0009600-T01-IM5	A	1081	K1081Rfs*37 (driver)	LOF	na	Fs	*	no	X	**
Pitié_Salpétrière	10891T	A	1082	S1082*	LOF	CC+ short Telo	*	X	no	X	*
TCGA	GLSS-HK-0004-R1	H3.3mt	1082	S1082* (driver)	LOF	na	*	*	no	X	**
TCGA	P-0013747-T01-IM5	A	1083	K1083Qfs*7(driver)	LOF	na	Fs_2nd	*/*	yes	X	**
TCGA	GLSS-SF-0007-R1	A	1087	Y1087*(driver)	LOF	na	*_2nd	splice/*	yes	X	**
TCGA	P07_Pri	A	1087	Y1087*(driver)	LOF	na	*_2nd	splice/*	yes	X	**
Pitié_Salpétrière	8975T	A	1087	Y1087Kfs*26	LOF	ALT	Fs	X	no	X	**
TCGA	TCGA-S9-A6U1-01	A	1090	E1090Rfs*27 (driver)	LOF	na	Fs	*	no	X	*
TCGA	TCGA-HT-7472-01	A	1090	E1090Rfs*27 (driver)	LOF	na	Fs	*	no	X	**
TCGA	GLSS-JX-0006-R1	A	1090	E1090Rfs*27 (driver), S1921N	LOF	na	Fs	*/Mis	yes_princeps	X	**
TCGA	P-0002695-T01-IM3	A	1093	R1093M, S1895N	VUS	na	missense	Mis/Mis	yes_princeps	X	**
Pitié_Salpétrière	10268T	GBM	1099	K1099N	no effect	TA+	missense	X	no	X	*
TCGA	P-0000611-T01-IM3	A	1101	S1101* (driver)	LOF	na	*	*	no	X	**
TCGA	TCGA-E1-A7YW-01	A	1108	S1108Hfs*10 (driver)	LOF	na	Fs	*	no	X	**
TCGA	P-0009852-T01-IM5	GBM	1123	N1123K	VUS	na	missense	Mis	no	X	*
TCGA	TCGA-FG-7638-01	OD	1131	R1131G	no effect	na	missense	Mis	no	X	*
TCGA	TRF035201	OD	1140	L1140Ffs*8 (driver)	LOF	na	Fs	*	no	X	**
TCGA	P-0003643-T01-IM5	A	1143	K1143Rfs*47 (driver)	LOF	na	Fs	*	no	X	**
TCGA	GLSS-SM-R058-TP	GBM	1151	S1151Rfs*33 (driver)	LOF	na	Fs	*	no	X	*
TCGA	P-0003529-T01-IM5	GBM	1152	G1152D	VUS	na	missense_2nd	Mis/Mis	yes	X	**
Pitié_Salpétrière	8562T	A	1163	E1163fs	LOF	CC+ short Telo	Fs	X	no	X	**
TCGA	P-0002194-T01-IM3	GBM	1172	T1172N	VUS	na	missense	Mis	no	X	*
Pitié_Salpétrière	10956T	GBM	1209	E1209Rfs*4	LOF	CC+ short Telo	Fs	X	no	X	*/clonal
Pitié_Salpétrière	11051T	GBM	1209	E1209Rfs*4	LOF	CC+ short Telo	Fs	X	no	X	*/clonal
Pitié_Salpétrière	11165T	GBM	1209	E1209Rfs*4	LOF	CC+ short Telo	Fs	X	no	X	*
TCGA	s_AO_odg_008_T	GBM	1210	D1210V	VUS	na	missense	Mis	no	X	*
TCGA	TCGA-14-4157-01	A	1213	Q1213Rfs*4 (driver)	LOF	na	Fs	*	no	X	**
TCGA	P-0010753-T01-IM5	GBM	1218	E1218V	VUS	na	missense	Mis	no	X	**
TCGA	TCGA-HT-A5R5-01	A	1223	E1223* (driver)	LOF	na	*	*	no	X	*
TCGA	TCGA-P5-A5EV-01	A	1237	S1237* (driver)	LOF	na	Fs	*	no	X	**
TCGA	P-0019644-T01-IM6	A	1237	S1237Hfs*41 (driver)	LOF	na	Fs	*	no	X	**
TCGA	P-0003900-T01-IM5	GBM	1245	S1245L, R484K	VUS	na	missense	Mis/Mis	yes_princeps	X	**
TCGA	GLSS-MD-0027-R2	A	1246	X1246_splice (driver)	LOF	na	splice	splice	no	X	**
TCGA	TCGA-S9-A6UA-01	MAPK	1270	X1270_splice (driver)	LOF	na	splice	splice	no	X	**
TCGA	TCGA-HT-7686-01	A	1285	S1285Pfs*61 (driver)	LOF	na	Fs	*	no	X	*
TCGA	TCGA-P5-A5F2-01	A	1296	P1296* (driver)	LOF	na	*	*	no	X	*
TCGA	TCGA-HT-A5R7-01	A	1300	K1300Efs*9 (driver)	LOF	na	Fs	*	no	X	**
TCGA	TCGA-R8-A6YH-01	A	1300	K1300Efs*9 (driver)	LOF	na	Fs	*	no	X	**
Pitié_Salpétrière	10622T	A	1301	K1301*	LOF	CC+ short Telo	*	X	no	X	**
TCGA	TCGA-S9-A7IS-01	A	1302	R1302Efs*44 (driver)	LOF	na	Fs	*	no	X	*
TCGA	P-0006782-T01-IM5	A	1302	R1302Efs*44(driver)	LOF	na	Fs_2nd	*/*	yes	X	**
Pitié_Salpétrière	10422T	A	1302	R1302Kfs*7	LOF	long telo	Fs	X	no	X	*
TCGA	Patient-05-T	A	1302	R1302Kfs*7 (driver)	LOF	na	Fs	*	no	X	**
TCGA	P-0003467-T01-IM5	A	1302	R1302Kfs*7 (driver)	LOF	na	Fs	*	no	X	**
TCGA	P-0003449-T01-IM5	A	1302	R1302Kfs*7 (driver)	LOF	na	Fs	*	no	X	**
TCGA	TCGA-QH-A6X9-01	A	1302	R1302Kfs*7 (driver), HOMDEL (driver)	LOF	na	Fs	*/HOMDEL	yes_princeps	X	**
TCGA	TCGA-TM-A84I-01	A	1302	R1302Lfs*43 (driver)	LOF	na	Fs	*	no	X	**
TCGA	P24_Pri	A	1302	R1302Nfs*6(driver)	LOF	na	Fs_2nd	*/*	yes	X	**
TCGA	TCGA-S9-A89V-01	MAPK	1307	N1307Mfs*39 (driver), AMP	LOF	na	Fs	*/AMP	yes_princeps	X	**
TCGA	P-0019244-T01-IM6	GBM	1315	X1315_splice (driver), R160Tfs*29 (driver), T899M, G1974V, G619S, V520I, K297N	LOF	na	Fs	*/*	yes_princeps	X	**
TCGA	P-0007914-T01-IM5	A	1318	N1318Kfs*6 (driver)	LOF	na	Fs	*	no	X	*
TCGA	P-0019556-T01-IM6	GBM	1318	N1318Kfs*6 (driver)	LOF	na	Fs	*	no	X	*
TCGA	TCGA-CS-6666-01	A	1318	N1318Kfs*6 (driver)	LOF	na	Fs	*	no	X	**
TCGA	P-0004515-T01-IM5	A	1318	N1318Kfs*6 (driver), R444* (driver)	LOF	na	Fs	*/*	yes_princeps	X	**
TCGA	P-0015912-T01-IM6	A	1319	Q1319E	VUS	na	missense_2nd	*/Mis	yes	X	**
TCGA	TCGA-P5-A5EU-01	A	1319	Q1319Rfs*4 (driver)	LOF	na	Fs	*	no	X	**
TCGA	P-0015912-T01-IM6	A	1324	S1324* (driver), Q1319E	LOF	na	*	*/Mis	yes_princeps	X	**
TCGA	TCGA-S9-A6U6-01	A	1332	K1332* (driver)	LOF	na	*	*	no	X	**
TCGA	GLSS-SF-0018-R1	A	1332	K1332* (driver)	LOF	na	*	*	no	X	**
TCGA	P18_Pri_A	A	1332	K1332* (driver)	LOF	na	*	*	no	X	**
TCGA	P-0002043-T01-IM3	A	1338	H1338Kfs*17(driver)	LOF	na	Fs_2nd	*/*	yes	X	**
TCGA	P-0004430-T02-IM5	A	1338	H1338Qfs*11 (driver)	LOF	na	Fs	*	no	X	*
TCGA	TCGA-HW-7490-01	A	1338	H1338Qfs*11 (driver)	LOF	na	Fs	*	no	X	**
Pitié_Salpétrière	8465T	OD	1342	R1342Q	no effect	TA+	missense	X	no	X	*
TCGA	TRF038581	A	1346	T1346* (driver)	LOF	na	*	*	no	X	*
TCGA	P-0004256-T01-IM5	A	1346	T1346* (driver)	LOF	na	*	*	no	X	**
TCGA	GLSS-SF-0013-R1	A	1346	T1346* (driver)	LOF	na	*	*	no	X	**
TCGA	P13_Pri	A	1346	T1346* (driver)	LOF	na	*	*	no	X	**
TCGA	P-0010530-T01-IM5	A	1347	V1347Efs*2 (driver)	LOF	na	Fs	*	no	X	**
TCGA	TCGA-HT-7855-01	A	1347	V1347Efs*2 (driver)	LOF	na	Fs	*	no	X	**
TCGA	TCGA-WY-A858-01	A	1357	K1357Rfs*18 (driver)	LOF	na	Fs	*	no	X	*
TCGA	TCGA-QH-A65S-01	A	1359	K1359Sfs*16 (driver)	LOF	na	Fs	*	no	X	*
TCGA	TCGA-06-A7TL-01	A	1362	E1362* (driver)	LOF	na	*	*	no	X	*
TCGA	P-0006019-T01-IM5	A	1363	H1363Rfs*12 (driver)	LOF	na	Fs	*	no	X	**
TCGA	P-0010369-T01-IM5	A	1365	E1365Rfs*13 (driver)	LOF	na	Fs	*	no	X	**
TCGA	TCGA-74-6575-01	GBM	1371	R1371T	VUS	na	missense	Mis	no	X	*
TCGA	GLSS-SF-0025-R1	A	1373	K1373Gfs*4 (driver)	LOF	na	Fs	*	no	X	**
TCGA	P25_Pri	A	1373	K1373Gfs*4 (driver)	LOF	na	Fs	*	no	X	**
TCGA	TCGA-TQ-A7RJ-01	A	1374	X1374_splice (driver)	LOF	na	splice	splice	no	X	*
TCGA	P07_Pri	A	1374	X1374_splice (driver), Y1087* (driver), G1088A	LOF	na	splice	splice/*	yes_princeps	X	**
TCGA	GLSS-SF-0007-R1	A	1374	X1374_splice (driver), Y1087* (driver), G1088A	LOF	na	splice	splice/*	yes_princeps	X	**
TCGA	P-0004396-T01-IM5	A	1382	S1382* (driver)	LOF	na	*	*	no	X	**
TCGA	TCGA-FG-6689-01	A	1387	S1387* (driver)	LOF	na	*	*	no	X	**
TCGA	P-0017922-T01-IM6	A	1388	G1388* (driver)	LOF	na	*	*	no	X	*
Pitié_Salpétrière	9702T	MAPK (glioneural)	1390	S1390Kfs*99	LOF	CC+ short Telo	Fs	X	no	X	**
TCGA	P-0002294-T01-IM3	A	1395	E1395Dfs*95 (driver)	LOF	na	Fs	*	no	X	**
TCGA	GLSS-CU-R009-R1	A	1401	R1401W	VUS	na	missense_2nd	*/Mis	yes	X	**
TCGA	GLSS-MD-0009-R1	A	1405	R1405G	VUS	na	missense	Mis	no	X	**
TCGA	TRF029667	OD	1405	X1405_splice (driver), D2082N	LOF	na	splice	splice/Mis	yes_princeps	X	**
TCGA	GLSS-SF-0026-R1	A	1408	K1408Nfs*11 (driver)	LOF	na	Fs	*	no	X	*
TCGA	P26_Pri_A	A	1408	K1408Nfs*11 (driver)	LOF	na	Fs	*	no	X	*
TCGA	TRF041805	A	1409	K1409Qfs*80(driver)	LOF	na	Fs_2nd	*/*	yes	X	**
TCGA	P-0003669-T01-IM5	A	1410	A1410Qfs*80 (driver)	LOF	na	Fs	*	no	X	*
TCGA	C3N-00663	A	1415	N1415Ifs*75 (driver)	LOF	na	Fs	*	no	X	**
TCGA	TCGA-S9-A6WQ-01	A	1416	Q1416Ifs*71 (driver)	LOF	na	Fs	*	no	X	*
TCGA	TCGA-E1-A7YI-01	A	1420	K1420* (driver)	LOF	na	*	*	no	X	*
TCGA	TCGA-S9-A6U9-01	A	1420	K1420Tfs*9 (driver)	LOF	na	Fs	*	no	X	**
Pitié_Salpétrière	10900T	A	1422	K1422*	LOF	long telo	*	X	no	X	**
TCGA	TRF020703	GBM	1424	K1424Gfs*65 (driver)	LOF	na	Fs	*	no	X	*
TCGA	TCGA-06-2570-01	A	1424	K1424Gfs*65 (driver)	LOF	na	Fs	*	no	X	**
TCGA	P-0007814-T01-IM5	A	1425	R1425Kfs*5 (driver)	LOF	na	Fs	*	no	X	*
Pitié_Salpétrière	10624T	A	1426	R1426*	LOF	CC+ short Telo	*	X	no	X	*
TCGA	TCGA-DU-5855-01	A	1426	R1426* (driver)	LOF	na	Fs	*	no	X	*
TCGA	7316-319	other	1426	R1426* (driver)	LOF	na	Fs	*	no	X	*
TCGA	TCGA-FG-A70Y-01	A	1426	R1426* (driver)	LOF	na	Fs	*	no	X	*
TCGA	TCGA-DU-6396-01	A	1426	R1426* (driver)	LOF	na	Fs	*	no	X	*
TCGA	TCGA-HT-7603-01	A	1426	R1426* (driver)	LOF	na	Fs	*	no	X	**
TCGA	P-0013281-T01-IM5	A	1426	R1426* (driver)	LOF	na	Fs	*	no	X	**
TCGA	P-0001076-T01-IM3	A	1426	R1426* (driver)	LOF	na	Fs	*	no	X	**
TCGA	TCGA-FG-8191-01	A	1426	R1426* (driver)	LOF	na	Fs	*	no	X	**
TCGA	P-0010354-T01-IM5	A	1426	R1426* (driver)	LOF	na	Fs	*	no	X	**
TCGA	TRF050441	A	1426	R1426* (driver), K425Rfs*8 (driver)	LOF	na	Fs	*/*	yes_princeps	X	**
TCGA	TCGA-TQ-A7RK-01	A	1431	Q1431* (driver)	LOF	na	*	*	no	X	**
TCGA	P-0001279-T01-IM3	A	1450	E1450Gfs*15 (driver)	LOF	na	Fs	*	no	X	*
TCGA	TRF036748	A	1491	T1491Nfs*6 (driver)	LOF	na	Fs	*	no	X	**
TCGA	P-0010259-T01-IM5	A	1504	R1504* (driver)	LOF	na	Fs	*	no	X	**
TCGA	P-0003392-T01-IM5	A	1504	R1504Qfs*5 (driver)	LOF	na	Fs	*	no	X	*
TCGA	TCGA-E1-5302-01	A	1504	R1504Qfs*5 (driver)	LOF	na	Fs	*	no	X	**
TCGA	P-0017763-T01-IM6	A	1514	R1514* (driver)	LOF	na	Fs	*	no	X	**
TCGA	C3L-02984	A	1514	R1514* (driver)	LOF	na	Fs	*	no	X	**
TCGA	P-0002043-T01-IM3	A	1514	R1514* (driver), H1338Kfs*17 (driver)	LOF	na	Fs	*/*	yes_princeps	X	**
Pitié_Salpétrière	8886T	GBM	1515	E1515fs	secondary hit no effect	TA+	Fs	X	no	X	*/clonal
TCGA	P-0017675-T01-IM5	GBM	1517	L1517S	VUS	na	missense_2nd	Mis/Mis	yes	X	**
TCGA	GLSS-SU-0005-R2	A	1518	R1518*(driver)	LOF	na	*_2nd	splice/*	yes	X	**
TCGA	P-0015289-T01-IM6	A	1519	X1519_splice (driver)	LOF	na	splice	splice	no	X	**
TCGA	GLSS-SU-0005-R2	A	1519	X1519_splice (driver), R1518* (driver)	LOF	na	splice	splice/*	yes_princeps	X	**
TCGA	s_AO_odg_003_T	GBM	1531	C1531* (driver)	LOF	na	*	*	no	X	*
Pitié_Salpétrière	8942T	A	1544	T1544fs	LOF	ALT	Fs	X	no	X	**
TCGA	P-0009309-T01-IM5	A	1565	V1565del	VUS	na	DEL/INS (in frame)	DELINS	no	SN2-domain	*
TCGA	TCGA-HT-8563-01	A	1567	X1567_splice (driver)	LOF	na	splice	splice	no	SN2-domain	*
TCGA	P-0012463-T03-IM6	A	1567	X1567_splice (driver)	LOF	na	splice	splice	no	SN2-domain	*
TCGA	Patient-34-T	A	1567	X1567_splice (driver)	LOF	na	splice	splice	no	SN2-domain	*
TCGA	P05_Pri	A	1576	C1576Y, D1719G	VUS	na	missense	Mis/Mis	yes_princeps	SN2-domain	**
TCGA	P-0019052-T01-IM6	A	1579	V1579Efs*21 (driver)	LOF	na	Fs	*	no	SN2-domain	*
TCGA	P-0011279-T01-IM5	A	1579	V1579Efs*21 (driver)	LOF	na	Fs	*	no	SN2-domain	**
TCGA	TCGA-TM-A7CA-01	A	1579	V1579Efs*21 (driver)	LOF	na	Fs	*	no	SN2-domain	**
TCGA	P-0003636-T01-IM5	GBM	1582	T1582Nfs*19 (driver)	LOF	na	Fs	*	no	SN2-domain	**
TCGA	C3N-03182	GBM	1582	T1582Nfs*19 (driver)	LOF	na	Fs	*	no	SN2-domain	**
TCGA	P-0013029-T01-IM5	A	1582	T1582Nfs*19 (driver)	LOF	na	Fs	*	no	SN2-domain	**
TCGA	Patient-33-T	A	1582	T1582Nfs*19 (driver), G2075R	LOF	na	Fs	*/Mis	yes_princeps	SN2-domain	**
TCGA	P-0000651-T01-IM3	A	1583	K1583Nfs*22 (driver)	LOF	na	Fs	*	no	SN2-domain	*
TCGA	P-0004259-T01-IM5	A	1583	K1583Nfs*22 (driver)	LOF	na	Fs	*	no	SN2-domain	**
TCGA	P-0004270-T01-IM5	A	1583	K1583Nfs*22 (driver)	LOF	na	Fs	*	no	SN2-domain	**
TCGA	TRF030628	A	1583	K1583Nfs*22 (driver)	LOF	na	Fs	*	no	SN2-domain	**
TCGA	TCGA-P5-A72W-01	A	1590	C1590Y	VUS	na	missense	Mis	no	SN2-domain	**
Pitié_Salpétrière	10754T	GBM	1593	A1593D	LOF	CC+ short Telo	missense	X	no	SN2-domain	*
Pitié_Salpétrière	9113T	A	1594	H1594R	LOF	CC+ short Telo	missense	X	no	SN2-domain	clonal
TCGA	P-0018124-T01-IM6	A	1595	C1595* (driver)	LOF	na	*	*	no	SN2-domain	**
TCGA	TRF042358	A	1596	M1596V	VUS	na	missense	Mis	no	SN2-domain	**
TCGA	P-0004298-T01-IM5	A	1596	M1596V	VUS	na	missense	Mis	no	SN2-domain	**
TCGA	TCGA-FG-8182-01	A	1597	G1597Yfs*5 (driver)	LOF	na	Fs	*	no	SN2-domain	*
Pitié_Salpétrière	10772T	A	1599	G1599C	LOF	ALT	missense	X	no	SN2-domain	**
TCGA	TCGA-DH-5142-01	A	1603	Q1603R	VUS	na	missense	Mis	no	SN2-domain	**
TCGA	TCGA-HT-7610-01	A	1603	X1603_splice (driver)	LOF	na	splice	splice	no	SN2-domain	*
TCGA	TCGA-E1-A7YK-01	A	1612	L1612P	VUS	na	missense_2nd	Mis/Mis	yes	SN2-domain	**
Pitié_Salpétrière	9953T	A	1612	L1612R	LOF	ALT	missense	X	no	SN2-domain	*
TCGA	TCGA-FG-5965-01	A	1613	L1613* (driver)	LOF	na	*	*	no	SN2-domain	*
TCGA	Mayo-PDX-Sarkaria-174	GBM	1618	D1618N	VUS	na	missense	Mis	no	SN2-domain	*
TCGA	TCGA-RY-A83Z-01	A	1630	T1630Nfs*8 (driver)	LOF	na	Fs	*	no	SN2-domain	*
TCGA	TCGA-E1-A7YK-01	A	1632	L1632S, L1612P	VUS	na	missense	Mis/Mis	yes_princeps	SN2-domain	**
TCGA	P-0015393-T01-IM6	GBM	1634	W1634S	VUS	na	missense	Mis	no	SN2-domain	**
TCGA	TCGA-DU-7304-01	A	1640	K1640Sfs*6 (driver)	LOF	na	Fs	*	no	SN2-domain	**
TCGA	P-0019039-T01-IM6	A	1641	W1641* (driver)	LOF	na	*	*	no	SN2-domain	**
TCGA	P-0009046-T01-IM5	A	1656	L1656* (driver)	LOF	na	*	*	no	SN2-domain	**
TCGA	P-0006545-T01-IM5	H3.3mt	1664	E1664* (driver)	LOF	na	*	*	no	SN2-domain	**
TCGA	TCGA-DB-A64S-01	A	1672	W1672* (driver), Q292* (driver)	LOF	na	*	*/*	yes_princeps	SN2-domain	**
TCGA	TCGA-06-6701-01	A	1679	M1679_I1680del	VUS	na	DEL/INS (in frame)	DELINS	no	SN2-domain	**
TCGA	P-0017033-T01-IM6	A	1679	M1679Nfs*6 (driver)	LOF	na	Fs	*	no	SN2-domain	*
TCGA	P-0000749-T01-IM3	A	1691	Q1691* (driver)	LOF	na	*	*	no	SN2-domain	**
Pitié_Salpétrière	9973T	H3.3mt	1692	p.G1692Ter	LOF	ALT	*	X	no	SN2-domain	**
TCGA	P-0016957-T01-IM6	A	1702	E1702Yfs*22 (driver)	LOF	na	Fs	*	no	SN2-domain	*
TCGA	TCGA-HT-A74O-01	A	1702	E1702Yfs*22 (driver)	LOF	na	Fs	*	no	SN2-domain	**
Pitié_Salpétrière	10568T	A	1703	I1703Yfs*22	LOF	CC+ short Telo	Fs	X	no	SN2-domain	**
Pitié_Salpétrière	10550T	A	1712	G1712Afs*13	LOF	CC+ short Telo	Fs	X	no	SN2-domain	**
Pitié_Salpétrière	10091T	A	1712	G1712D	LOF	ALT	missense	X	no	SN2-domain	**
TCGA	TCGA-E1-A7YH-01	A	1712	G1712D	LOF	na	missense	Mis	no	SN2-domain	*
Pitié_Salpétrière	9335T	A	1712	G1712R	LOF	ALT	missense	X	no	SN2-domain	*
TCGA	P-0008382-T01-IM5	A	1718	C1718Mfs*6 (driver)	LOF	na	Fs	*	no	SN2-domain	**
TCGA	P05_Pri	A	1719	D1719G	VUS	na	missense_2nd	Mis/Mis	yes	SN2-domain	**
TCGA	GLSS-SF-0005-R1	A	1719	D1719G	VUS	na	missense_2nd	Mis	no	SN2-domain	*
TCGA	P-0017675-T01-IM5	GBM	1735	M1735I, L1517S	VUS	na	missense	Mis/Mis	yes_princeps	SN2-domain	**
TCGA	TCGA-TM-A84H-01	A	1739	R1739* (driver)	LOF	na	*	*	no	SN2-domain	*
TCGA	TCGA-S9-A6WG-01	A	1739	R1739* (driver)	LOF	na	*	*	no	SN2-domain	**
TCGA	TCGA-27-2521-01	A	1740	S1740* (driver)	LOF	na	*	*	no	SN2-domain	**
Pitié_Salpétrière	10753T	A	1742	R1742G	LOF	ALT	missense	X	no	SN2-domain	*
TCGA	TCGA-DU-A5TR-01	A	1742	R1742G	LOF	na	missense	Mis	no	SN2-domain	**
TCGA	P-0013676-T01-IM5	GBM	1746	L1746* (driver), G51V	LOF	na	*	*/Mis	yes_princeps	SN2-domain	**
Pitié_Salpétrière	9299T	A	1753	N1753S	LOF	CC+ short Telo	missense	X	no	SN2-domain	**
TCGA	TCGA-DH-A66G-01	A	1757	X1757_splice (driver)	LOF	na	splice	splice	no	SN2-domain	*
TCGA	GLSS-SF-0006-R1	A	1757	X1757_splice (driver)	LOF	na	splice	splice	no	SN2-domain	**
TCGA	P06_Rec	A	1757	X1757_splice (driver)	LOF	na	splice	splice	no	SN2-domain	**
TCGA	TCGA-HT-7688-01	A	1758	X1758_splice (driver)	LOF	na	splice	splice	no	SN2-domain	*
TCGA	P-0006396-T01-IM5	A	1758	Y1758* (driver)	LOF	na	*	*	no	SN2-domain	**
TCGA	TCGA-DU-6408-01	A	1763	N1763K	VUS	na	missense_2nd	Mis/Mis	yes	SN2-domain	**
TCGA	TCGA-FG-A4MY-01	A	1766	K1766Rfs*16 (driver)	LOF	na	Fs	*	no	SN2-domain	*
TCGA	TCGA-DU-6408-01	A	1784	I1784S, N1763K	VUS	na	missense	Mis/Mis	yes_princeps	SN2-domain	**
TCGA	P-0010380-T01-IM5	GBM	1788	Q1788H	VUS	na	missense	Mis	no	SN2-domain	**
Pitié_Salpétrière	8545T	H3.3mt	1789	p.C1789fs	secondary hit no effect	TA+	Fs	X	no	SN2-domain	**
TCGA	TCGA-DU-A76O-01	A	1791	D1791Y	VUS	na	missense_2nd	*/Mis	yes	SN2-domain	**
TCGA	TCGA-HT-7470-01	A	1798	R1798Kfs*12 (driver)	LOF	na	Fs	*	no	SN2-domain	**
Pitié_Salpétrière	10962T	A	1798	R1798Sfs*11	LOF	CC+ short Telo	Fs	X	no	SN2-domain	**
TCGA	TCGA-14-1453-01	GBM	1803	R1803H	VUS	na	missense	Mis	no	SN2-domain	**
Pitié_Salpétrière	10684T	A	1808	Y1808Mfs*4	LOF	CC+ short Telo	Fs	X	no	SN2-domain	**
TCGA	TRF039306	OD	1809	E1809Vfs*50 (driver)	LOF	na	Fs	*	no	SN2-domain	**
TCGA	P-0000223-T01-IM3	A	1821	T1821Qfs*7 (driver)	LOF	na	Fs	*	no	SN2-domain	*
TCGA	P-0018387-T01-IM6	A	1822	A1822Efs*3 (driver), S282Afs*6 (driver)	LOF	na	Fs	*/*	yes_princeps	SN2-domain	**
TCGA	TCGA-06-0213-01	IDHwt g.2-3 (pTERTwt)	1827	L1827Cfs*9 (driver)	LOF	na	Fs	*	no	SN2-domain	*
TCGA	TRF046085	A	1833	Y1833Cfs*27 (driver)	LOF	na	Fs	*	no	SN2-domain	**
TCGA	GLSS-HK-0002-R1	A	1838	R1838* (driver)	LOF	na	*	*	no	SN2-domain	**
TCGA	P-0017017-T01-IM6	A	1838	R1838Efs*2 (driver)	LOF	na	Fs	*	no	SN2-domain	**
TCGA	TCGA-14-1456-01	A	1843	Q1843H	VUS	na	missense	Mis	no	SN2-domain	**
TCGA	P-0014883-T01-IM6	A	1847	Y1847Lfs*14 (driver), I528Lfs*33 (driver)	LOF	na	Fs	*/*	yes_princeps	SN2-domain	**
TCGA	P-0008923-T01-IM5	GBM	1848	Q1848* (driver)	LOF	na	*	*	no	SN2-domain	**
TCGA	P-0009398-T01-IM5	A	1856	X1856_splice (driver)	LOF	na	splice	splice	no	SN2-domain	**
TCGA	TCGA-HT-7474-01	A	1874	Q1874Pfs*8 (driver)	LOF	na	Fs	*	no	SN2-domain	**
TCGA	TCGA-FG-A4MX-01	A	1879	L1879V	VUS	na	missense	Mis	no	SN2-domain	**
TCGA	P-0006970-T01-IM5	GBM	1883	W1883* (driver)	LOF	na	*	*	no	SN2-domain	**
Pitié_Salpétrière	10368T	A	1885	H1885R	LOF	CC+ short Telo	missense	X	no	SN2-domain	*/SNP
TCGA	P-0002695-T01-IM3	A	1895	S1895N	VUS	na	missense_2nd	Mis/Mis	yes	X	**
TCGA	TCGA-HT-7676-01	A	1920	M1920* (driver)	LOF	na	*	*	no	X	**
TCGA	GLSS-JX-0006-R1	A	1921	S1921N	VUS	na	missense_2nd	*/Mis	yes	X	**
TCGA	TRF060952	A	1929	X1929_splice (driver)	LOF	na	splice	splice	no	X	**
TCGA	TCGA-WY-A85A-01	A	1929	X1929_splice (driver)	LOF	na	splice	splice	no	X	**
TCGA	TCGA-FG-7636-01	A	1932	K1932Gfs*21 (driver)	LOF	na	Fs	*	no	X	*
TCGA	P-0004319-T01-IM5	A	1935	K1935Efs*7 (driver)	LOF	na	Fs	*	no	X	*
Pitié_Salpétrière	10930T	A	1936	K1936Rfs*19	LOF	long telo	Fs	X	no	X	**
TCGA	C3L-02708	A	1940	D1940Ifs*15 (driver)	LOF	na	Fs	*	no	X	**
TCGA	TCGA-DU-7011-01	A	1940	D1940Ifs*15(driver)	LOF	na	Fs_2nd	*/*	yes	X	**
Pitié_Salpétrière	10658T	A	1940	D1940Rfs*2	LOF	CC+ short Telo	Fs	X	no	X	**
TCGA	TCGA-FN-7833-01	A	1940	D1940Rfs*2 (driver)	LOF	na	Fs	*	no	X	**
TCGA	TCGA-FG-A4MT-01	A	1940	D1940Vfs*14 (driver)	LOF	na	Fs	*	no	X	*
TCGA	TRF043499	A	1940	D1940Vfs*14 (driver)	LOF	na	Fs	*	no	X	**
TCGA	TRF042507	A	1940	D1940Vfs*14 (driver)	LOF	na	Fs	*	no	X	**
TCGA	P-0004599-T01-IM5	A	1960	S1960* (driver)	LOF	na	*	*	no	X	**
TCGA	P-0003579-T01-IM5	A	1960	S1960* (driver)	LOF	na	*	*	no	X	**
TCGA	TCGA-CS-4942-01	A	1965	G1965Vfs*17 (driver)	LOF	na	Fs	*	no	X	*
TCGA	P-0019244-T01-IM6	GBM	1974	G1974V	VUS	na	missense	*/*	yes	X	**
TCGA	TCGA-02-2483-01	A	2001	W2001Cfs*14 (driver)	LOF	na	Fs		no	X	**
TCGA	TCGA-HT-7482-01	A	2019	K2019E	VUS	na	missense	Mis	no	X	*
TCGA	GLSS-HK-0005-R1	A	2019	K2019E	VUS	na	missense	Mis	no	X	*
TCGA	TCGA-HT-7690-01	A	2019	K2019E	VUS	na	missense	Mis	no	X	**
TCGA	TCGA-HT-7902-01	A	2027	L2027P	VUS	na	missense	Mis	no	helicase	*
TCGA	TCGA-TQ-A7RH-01	A	2027	L2027P	VUS	na	missense	Mis	no	helicase	**
Pitié_Salpétrière	8089T	H3.3mt	2028	p.R2028*	LOF	ALT	*	X	no	helicase	*
TCGA	P-0001450-T01-IM3	A	2037	V2037I	VUS	na	missense_2nd	*/Mis	yes	helicase	**
TCGA	P-0001823-T01-IM3	A	2037	X2037_splice (driver)	LOF	na	splice	splice	no	helicase	*
TCGA	GLSS-SM-R076-R1	A	2037	X2037_splice (driver)	LOF	na	splice	splice	no	helicase	*
TCGA	TCGA-DU-5853-01	A	2037	X2037_splice (driver)	LOF	na	splice	splice	no	helicase	**
TCGA	GLSS-SF-0021-R1	A	2040	F2040Qfs*11 (driver)	LOF	na	Fs	*	no	helicase	**
TCGA	P21_Pri	A	2040	F2040Qfs*11 (driver)	LOF	na	Fs	*	no	helicase	**
TCGA	TCGA-WY-A85B-01	A	2073	G2073S	VUS	na	missense	Mis	no	helicase	**
TCGA	Patient-33-T	A	2075	G2075R	VUS	na	missense_2nd	*/Mis	yes	helicase	**
TCGA	P-0003820-T01-IM5	A	2076	K2076* (driver)	LOF	na	*	*	no	helicase	**
TCGA	TRF029667	OD	2082	D2082N	VUS	na	missense_2nd	splice/Mis	yes	helicase	**
TCGA	TCGA-S9-A6TV-01	A	2085	R2085P	VUS	na	missense	Mis	no	helicase	**
TCGA	GLSS-MD-0004-R2	GBM	2089	S2089F	VUS	na	missense	Mis	no	helicase	*
TCGA	TCGA-P5-A736-01	A	2094	S2094* (driver)	LOF	na	*	*	no	helicase	*
TCGA	TCGA-CS-4943-01	A	2094	S2094* (driver)	LOF	na	*	*	no	helicase	**
TCGA	TRF022348	A	2096	K2096Rfs*13 (driver)	LOF	na	Fs	*	no	helicase	**
TCGA	P-0004849-T01-IM5	GBM	2096	K2096Sfs*12 (driver)	LOF	na	Fs	*	no	helicase	**
TCGA	P-0010792-T01-IM5	A	2096	K2096Sfs*12 (driver)	LOF	na	Fs	*	no	helicase	**
TCGA	TRF071705	GBM	2099	A2099V	VUS	na	missense	Mis	no	helicase	**
TCGA	Mayo-PDX-Sarkaria-102	GBM	2101	E2101K	VUS	na	missense	Mis	no	helicase	**
TCGA	P-0007024-T01-IM5	GBM	2103	N2103Y	VUS	na	missense	Mis	no	helicase	*
TCGA	P-0001921-T01-IM3	A	2109	X2109_splice (driver)	LOF	na	splice	splice	no	helicase	**
TCGA	TCGA-HT-7483-01	A	2109	X2109_splice (driver)	LOF	na	splice	splice	no	helicase	**
TCGA	P-0002633-T01-IM3	GBM	2111	R2111* (driver)	LOF	na	*	*	no	helicase	**
TCGA	TCGA-DU-7007-01	A	2111	R2111* (driver)	LOF	na	*	*	no	helicase	**
TCGA	TCGA-E1-5304-01	A	2111	R2111* (driver)	LOF	na	*	*	no	helicase	**
TCGA	C3N-02786	GBM	2111	R2111L	VUS	na	missense	Mis	no	helicase	*
Pitié_Salpétrière	10664T	?	2111	R2111Q	LOF	ALT	missense	X	no	helicase	*
TCGA	TCGA-DB-5275-01	A	2113	F2113Lfs*10 (driver)	LOF	na	Fs	*	no	helicase	**
Pitié_Salpétrière	10373T	A	2113	F2113Sfs*9	LOF	ALT	Fs	X	no	helicase	*
Pitié_Salpétrière	10914T	A	2113	F2113Sfs*9	LOF	CC+ short Telo	Fs	X	no	helicase	**
TCGA	Patient-06-T	A	2113	F2113Sfs*9 (driver)	LOF	na	Fs	*	no	helicase	*
TCGA	TCGA-HT-7857-01	IDHwt g.2-3 (pTERTwt)	2113	F2113Sfs*9 (driver)	LOF	na	Fs	*	no	helicase	*
TCGA	P-0014018-T01-IM5	A	2113	F2113Sfs*9 (driver)	LOF	na	Fs	*	no	helicase	*
TCGA	TCGA-DU-A6S7-01	A	2113	F2113Sfs*9 (driver)	LOF	na	Fs	*	no	helicase	*
TCGA	P-0003424-T01-IM5	GBM	2113	F2113Sfs*9 (driver)	LOF	na	Fs	*	no	helicase	*
TCGA	TCGA-06-A5U0-01	H3.3mt	2113	F2113Sfs*9 (driver)	LOF	na	Fs	*	no	helicase	*
TCGA	P-0016896-T01-IM6	A	2113	F2113Sfs*9 (driver)	LOF	na	Fs	*	no	helicase	**
TCGA	P-0009244-T01-IM5	A	2113	F2113Sfs*9 (driver)	LOF	na	Fs	*	no	helicase	**
TCGA	TCGA-DU-7306-01	A	2113	F2113Sfs*9 (driver)	LOF	na	Fs	*	no	helicase	**
TCGA	GLSS-MD-0086-R1	A	2113	F2113Sfs*9 (driver)	LOF	na	Fs	*	no	helicase	**
TCGA	P-0006410-T01-IM5	H3.3mt	2113	F2113Sfs*9 (driver)	LOF	na	Fs	*	no	helicase	**
TCGA	TCGA-QH-A6CW-01	A	2113	F2113Sfs*9 (driver)	LOF	na	Fs	*	no	helicase	**
TCGA	TCGA-HT-A5RB-01	A	2113	F2113Sfs*9 (driver)	LOF	na	Fs	*	no	helicase	**
TCGA	TCGA-DB-A4XD-01	A	2113	F2113Sfs*9 (driver), X199_splice (driver)	LOF	na	Fs	*/splice	yes_princeps	helicase	**
Pitié_Salpétrière	8565T	H3.3mt	2113	p.F2113Sfs*9	LOF	CC+ short Telo	Fs	X	no	helicase	*
TCGA	TRF040880	A	2131	R2131* (driver)	LOF	na	*	*	no	helicase	*
TCGA	P-0003447-T01-IM5	A	2131	R2131* (driver)	LOF	na	*	*	no	helicase	**
TCGA	TCGA-WY-A85D-01	A	2131	R2131* (driver)	LOF	na	*	*	no	helicase	**
TCGA	P10_Pri	A	2140	N2140S	VUS	na	missense	Mis	no	helicase	*
TCGA	GLSS-SF-0010-R1	A	2140	N2140S	VUS	na	missense	Mis	no	helicase	*
Pitié_Salpétrière	8761T	A	2140	N2140T	LOF	CC+ short Telo	missense	X	no	helicase	*
TCGA	TCGA-15-1444-01	A	2146	Q2146Efs*12 (driver)	LOF	na	Fs	*	no	helicase	*
TCGA	TCGA-DU-8163-01	A	2152	Y2152* (driver)	LOF	na	*	*	no	helicase	*
TCGA	TCGA-06-5858-01	IDHwt g.2-3 (pTERTwt)	2153	R2153C	VUS	na	missense	Mis	no	helicase	**
TCGA	C3L-02900	A	2167	A2167del	VUS	na	DEL/INS (in frame)	DELINS	no	helicase	**
TCGA	TCGA-FG-5963-01	GBM	2169	G2169E	VUS	na	missense	Mis	no	helicase	**
Pitié_Salpétrière	6378T	A	2169	G2169V	LOF	CC+ short Telo	missense	X	no	helicase	*/SNP
TCGA	7316-2140	GBM	2169	X2169_splice (driver)	LOF	na	splice	splice	no	helicase	**
TCGA	TCGA-DU-5872-01	A	2172	E2172A	no effect	na	missense	Mis	no	helicase	*
TCGA	TCGA-S9-A6U8-01	A	2172	E2172G	VUS	na	missense	Mis	no	helicase	**
Pitié_Salpétrière	10932T	A	2178	R2178Q	LOF	CC+ short Telo	missense	X	no	helicase	*
TCGA	TRF079056	A	2178	R2178Q	LOF	na	missense	Mis	no	helicase	**
TCGA	TCGA-HT-7478-01	A	2180	V2180A	VUS	na	missense	Mis	no	helicase	**
TCGA	GLSS-SF-0029-R1	A	2180	V2180Ifs*11 (driver)	LOF	na	Fs	*	no	helicase	**
TCGA	P29_Pri	A	2180	V2180Ifs*11 (driver)	LOF	na	Fs	*	no	helicase	**
TCGA	TCGA-HT-7475-01	A	2182	K2182R	VUS	na	missense	Mis	no	helicase	**
TCGA	Patient-12-T	GBM	2182	K2182Vfs*8 (driver)	LOF	na	Fs	*	no	helicase	**
TCGA	P-0002833-T01-IM3	GBM	2182	K2182Vfs*8 (driver)	LOF	na	Fs	*	no	helicase	**
Pitié_Salpétrière	2322T	H3.3mt	2184	p.S2184L	LOF	CC+ short Telo	missense	X	no	helicase	**
TCGA	TCGA-HT-8108-01	A	2187	F2187Lfs*16 (driver)	LOF	na	Fs	*	no	helicase	*
TCGA	TCGA-HT-7693-01	A	2188	R2188Q	VUS	na	missense	Mis	no	helicase	*
TCGA	TCGA-E1-A7YE-01	A	2189	V2189L	VUS	na	missense	Mis	no	helicase	*
TCGA	P-0013370-T01-IM5	A	2190	V2190Lfs*12 (driver)	LOF	na	Fs	*	no	helicase	**
Pitié_Salpétrière	10004T	A	2191	D2191G	LOF	CC+ short Telo	missense	X	no	helicase	**
TCGA	P-0001400-T01-IM3	A	2191	D2191G	LOF	na	missense	Mis	no	helicase	*
Pitié_Salpétrière	8334T	H3.3mt	2197	p.R2197H	LOF	ALT	missense	X	no	helicase	**
TCGA	7316-2594	H3.3mt	2197	R2197C	VUS	na	missense	Mis	no	helicase	**
TCGA	P-0010391-T01-IM5	GBM	2197	R2197H	VUS	na	missense	Mis	no	helicase	*
TCGA	TCGA-DU-7309-01	A	2203	E2203* (driver)	LOF	na	*	*	no	helicase	*
TCGA	Patient-10-T	MAPK (GBM NF1)	2203	E2203* (driver), E2203V	LOF	na	*	*/Mis	yes_princeps	helicase	**
TCGA	P-0007124-T01-IM5	MAPK (GBM NF1)	2203	E2203L	VUS	na	missense	Mis	no	helicase	**
TCGA	Patient-10-T	MAPK (GBM NF1)	2203	E2203V	VUS	na	missense_2nd	*/Mis	yes	helicase	**
TCGA	P-0001450-T01-IM3	A	2219	N2219Ifs*31 (driver), V2037I	LOF	na	Fs	*/Mis	yes_princeps	X	**
TCGA	TCGA-S9-A6TS-01	A	2228	T2228I	VUS	na	missense	Mis	no	X	*
TCGA	TCGA-E1-5305-01	A	2244	H2244Rfs*8 (driver)	LOF	na	Fs	*	no	X	*
TCGA	TRF028383	A	2252	H2252R	VUS	na	missense	Mis	no	X	*
TCGA	P-0018899-T01-IM6	H3.3mt	2252	H2252R	VUS	na	missense	Mis	no	X	**
TCGA	TCGA-06-5417-01	A	2254	H2254R	VUS	na	missense	Mis	no	X	*
TCGA	P-0006546-T01-IM5	A	2258	L2258Gfs*10 (driver)	LOF	na	Fs	*	no	X	**
TCGA	Patient-11-T	A	2258	L2258Gfs*10 (driver)	LOF	na	Fs	*	no	X	**
TCGA	TCGA-DU-A5TU-01	A	2266	L2266* (driver)	LOF	na	*	*	no	X	*
TCGA	TCGA-E1-A7Z3-01	A	2271	R2271Kfs*14 (driver)	LOF	na	Fs	*	no	X	*
Pitié_Salpétrière	10560T	GBM	2288	R2288H	no effect	TA+	missense	X	no	Pbox	*
TCGA	TCGA-DU-A7TA-01	A	2292	P2292Qfs*28 (driver)	LOF	na	Fs	*	no	Pbox	**
TCGA	GLSS-DK-0008-R1	IDHwt g.2-3 (pTERTwt)	2298	P2298S	VUS	na	missense	*/3Mis	yes	Pbox	**
Pitié_Salpétrière	8968T	GBM	2360	E2360G	no effect	TA+	missense	X	no	Pbox	*
TCGA	P-0004233-T01-IM5	GBM	2407	R2407* (driver)	LOF	na	*	*	no	X	*
TCGA	TCGA-DU-5852-01	GBM	2418	Y2418N	no effect	na	missense	Mis	no	Qbox	*
Pitié_Salpétrière	9561T	GBM	2434	G2434S	no effect	TA+	missense	X	no	X	*
TCGA	Mayo-PDX-Sarkaria-123	GBM	2458	G2458R	VUS	na	missense	Mis	no	X	*
TCGA	Mayo-PDX-Sarkaria-200	GBM	2485	G2485E	VUS	na	missense	Mis	no	X	*
TCGA	TCGA-HT-A618-01	A		AMP	VUS	na	AMP_2nd	*/AMP	yes	X	**
TCGA	TCGA-DU-6401-01	A		AMP	VUS	na	AMP_2nd	*/AMP	yes	X	**
TCGA	TCGA-S9-A89V-01	MAPK		AMP	VUS	na	AMP_2nd	*/AMP	yes	X	**
TCGA	TCGA-WY-A85C-01	A		AMP-rearrangemet	LOF	na	AMP	AMP	no	X	**
TCGA	P-0015357-T01-IM6	A		Deletion of 12 exons: out of frame	LOF	na	rearrangement	rearrangment	no	X	**
TCGA	P-0014498-T01-IM6	A		Deletion of 24 exons: out of frame	LOF	na	rearrangement	rearrangment	no	X	**
TCGA	P-0001253-T01-IM3	A		Duplication of 7 exons: out of frame	LOF	na	rearrangement	rearrangment	no	X	*
TCGA	TCGA-DU-8167-01	A		HOMDEL (driver)	LOF	na	HOMDEL	HOMDEL	no	X	**
TCGA	TCGA-CS-6665-01	A		HOMDEL (driver)	LOF	na	HOMDEL	HOMDEL	no	X	**
TCGA	TCGA-FG-A6J3-01	A		HOMDEL (driver)	LOF	na	HOMDEL	HOMDEL	no	X	**
TCGA	TCGA-S9-A6TU-01	A		HOMDEL (driver)	LOF	na	HOMDEL	HOMDEL	no	X	**
TCGA	TCGA-DU-7019-01	A		HOMDEL (driver)	LOF	na	HOMDEL	HOMDEL	no	X	**
TCGA	TCGA-HW-8321-01	A		HOMDEL (driver)	LOF	na	HOMDEL	HOMDEL	no	X	**
TCGA	TCGA-TQ-A7RW-01	A		HOMDEL (driver)	LOF	na	HOMDEL	HOMDEL	no	X	**
TCGA	7316-2152	H3.3mt		HOMDEL (driver)	LOF	na	HOMDEL	HOMDEL	no	X	**
TCGA	7316-2648	other		HOMDEL (driver)	LOF	na	HOMDEL	HOMDEL	no	X	**
TCGA	7316-2757	other		HOMDEL (driver)	LOF	na	HOMDEL	HOMDEL	no	X	**
TCGA	7316-3022	GBM		HOMDEL (driver)	LOF	na	HOMDEL	HOMDEL	no	X	**
TCGA	7316-306	other		HOMDEL (driver)	LOF	na	HOMDEL	HOMDEL	no	X	**
TCGA	7316-347	other		HOMDEL (driver)	LOF	na	HOMDEL	HOMDEL	no	X	**
TCGA	7316-937	other		HOMDEL (driver)	LOF	na	HOMDEL	HOMDEL	no	X	**
TCGA	P-0001881-T01-IM3	A		HOMDEL (driver)	LOF	na	HOMDEL	HOMDEL	no	X	**
TCGA	P-0001920-T01-IM3	A		HOMDEL (driver)	LOF	na	HOMDEL	HOMDEL	no	X	**
TCGA	P-0004288-T01-IM5	A		HOMDEL (driver)	LOF	na	HOMDEL	HOMDEL	no	X	**
TCGA	P-0014152-T01-IM5	A		HOMDEL (driver)	LOF	na	HOMDEL	HOMDEL	no	X	**
TCGA	P-0017307-T01-IM6	A		HOMDEL (driver)	LOF	na	HOMDEL	HOMDEL	no	X	**
TCGA	TCGA-28-1756-01	other		HOMDEL (driver)	LOF	na	HOMDEL	HOMDEL	no	X	**
TCGA	TCGA-CS-6667-01	A		HOMDEL (driver)	LOF	na	HOMDEL	HOMDEL	no	X	**
TCGA	TCGA-WH-A86K-01	A		HOMDEL (driver)	LOF	na	HOMDEL	HOMDEL	no	X	**
TCGA	TCGA-WY-A859-01	A		HOMDEL (driver)	LOF	na	HOMDEL	HOMDEL	no	X	**
TCGA	TRF043485	A		HOMDEL (driver)	LOF	na	HOMDEL	HOMDEL	no	X	**
TCGA	TCGA-QH-A6X9-01	A		HOMDEL(driver)	LOF	na	HOMDEL_2nd	*/HOMDEL	yes	X	**
TCGA	Mayo-PDX-Sarkaria-164	A		HOMDEL(driver)	LOF	na	HOMDEL_2nd	*/HOMDEL	yes	X	**

## Sheet: LEGEND
base	sample origin: Pitié-Salpétrière: local database;TCGA: 12 combined studies
sample_name	sample name
diagnosis	WHO2021 classification: GBM: glioblastoma; OD: oligodendroglioma (1p19q codeleted); A: IDHmt astrocytoma; MAPK: (NF1, BRAF, FGFR1…altered); other/?: unknown
amino_acid	amino acid involved in the alteration (p.)
alteration	detailed alteration (p.) (HOMDEL, DEL/INS, rearragement, missense, frameshift, stop)
function	consequence on protein (LOF:loss-of-function, VUS: variant of unknown significance, no effect: benign; FN: false negative; secondary hit no effect)
TMM	ALT+ : CC+ and long telo; CC+ long telo ; long telo ; TA+: ALT-; na: not available
type_mut	Mis: misssense; Fs: frameshift; *: stop; splice: splicing variant; DEL/INS: in frame deletion/insertion; AMP:amplification; HOMDEL: hemi/homozygous deletion; _2nd: secondary mutation
type_mut_per_sample	combined type of alteration per sample
multiple_hits_within_sample	multiple hit within the same sample : yes/no
protein_domain	major ATRX functional domains : helicase, SN2; P_box; Q_box; ADD
allele_involved	* : one WT allele; **: no WT allele; clonal: VAF(ATRXmt)<<sample cellularity; SNP: single nucleotide polymorphism
